# Supplementary material for: Diversity and Structure of the Endophytic Bacterial Communities Associated With Three Terrestrial Orchid Species as Revealed by 16S rRNA Gene Metabarcoding
Source: Front Microbiol. 2020 Dec 15;11:604964. doi: 10.3389/fmicb.2020.604964 (PMC7839077; doi:10.3389/fmicb.2020.604964)
Supplement: Supplementary file 2 [file Table_6.xls]

## Sheet: core_otus_100
Table S6. Core microbiome OTUs detected in the three terrestrial orchid species
Neottia ovata		Serapias vomeracea		Spiranthes spiralis
OTU	Genus	OTU	Genus	OTU	Genus
119	Xanthomonas	622	Ambiguous_taxa	72	Mitsuaria
1012	Ramlibacter	72	Mitsuaria	80	Tardiphaga
72	Mitsuaria	80	Tardiphaga	37	Variovorax
80	Tardiphaga	37	Variovorax	1015	Acidibacter
37	Variovorax	3701	Acinetobacter	695
13403	Acinetobacter	36		3701	Acinetobacter
36		883		13403
81		81		58
20	Anaerococcus	765	Agromyces	36
54	Anoxybacillus	111	Anaerococcus	129	Rhizobium
179	Aquabacterium	35	Anaerococcus	111	Anaerococcus
42	Bacillus	54	Anoxybacillus	35
2365	Burkholderia	179	Aquabacterium	426	Bradyrhizobium
45		18	Atopostipes	16	Brevundimonas
460	Comamonas	42	Bacillus	286	Corynebacterium1
8544	Corynebacterium1	758	Brevibacillus	8542
362		5728	Brevundimonas	28
286		16		2	Cutibacterium
6334		98	Clostridiumsensustricto1	925	Dokdonella
8542		460	Comamonas	109	Duganella
28		362	Corynebacterium1	114	Enhydrobacter
226	Corynebacterium	286		6	Luteibacter
8546	Cupriavidus	6334		272	Luteimonas
7		8542		156	Massilia
8526	Cutibacterium	28		79	Methylobacterium
979		226	Corynebacterium	44	Mycobacterium
8530		7584	Cupriavidus	636	Ochrobactrum
8529		7		488	Pantoea
8524		3059	Curtobacterium	3709	Peptostreptococcus
8531		8529	Cutibacterium	3058	Pseudarthrobacter
53		8524		2974	Pseudomonas
2		8531		8
8062		53		398	Reyranella
12	Dolosigranulum	2		462	Sphingomonas
109	Duganella	8062		14	Thermus
114	Enhydrobacter	12	Dolosigranulum
62	Escherichia-Shigella	114	Enhydrobacter
112	Finegoldia	62	Escherichia-Shigella
55	Granulicatella	112	Finegoldia
277	Haemophilus	350	Fusobacterium
6	Luteibacter	285	Gemella
173	Massilia	55	Granulicatella
32	Meiothermus	277	Haemophilus
432	Micrococcus	7828	Halomonas
410	Noviherbaspirillum	157	Herbaspirillum
77	Peptoniphilus	13305	Limnobacter
96	Pseudomonas	22
884		6	Luteibacter
8		7612	Luteimonas
2974		177
33		173	Massilia
424	Schlegelella	32	Meiothermus
462	Sphingomonas	191	Methyloversatilis
38	Staphylococcus	259	Neisseria
2654	Streptococcus	116	Nocardioides
13		95
922	Tepidimonas	410	Noviherbaspirillum
2995	Thermus	488	Pantoea
14		13927	Peptoniphilus
153	Varibaculum	77
284	Veillonella	31	Phenylobacterium
127	Vulcaniibacterium	39
		96	Pseudomonas
		2975
		884
		8
		2974
		30	Pseudoxanthomonas
		51	Psychrobacter
		26	Silanimonas
		462	Sphingomonas
		38	Staphylococcus
		87	Stenotrophomonas
		2654	Streptococcus
		59
		13
		2995	Thermus
		14
